# Supplementary material for: The bedrock topography of Gries- and Findelengletscher
Source: Copernicus journal article supplement (doi:10.5194/gh-73-1-2018), 2018-01-08
Supplement: Supplementary file [file gh-73-1-2018-supplement-title-page.pdf › gh-73-1-2018-supplement-title-page.pdf]

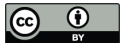

## *Supplement of*

# **The bedrock topography of Gries- and Findelengletscher**

**Nadine Feiger et al.**

*Correspondence to:* Nadine Feiger ([nadine\\_feiger@hotmail.com](mailto:nadine_feiger@hotmail.com))

- [gh-73-1-2018-supplement-title-page.pdf](#)
- [supplement\\_files](#)
  - [README.txt](#)
  - [bedrock\\_fin2016.asc](#)
  - [bedrock\\_gries2016.asc](#)
  - [dhm\\_fin2016.asc](#)
  - [dhm\\_gries2016.asc](#)
  - [ice\\_thickness\\_fin2016.asc](#)
  - [ice\\_thickness\\_gries2016.asc](#)
  - [uncertainty\\_GPR\\_fin2016.asc](#)
  - [uncertainty\\_GPR\\_gries2016.asc](#)
  - [uncertainty\\_ITEM\\_fin2016.asc](#)
  - [uncertainty\\_ITEM\\_gries2016.asc](#)
  - [uncertainty\\_combined\\_fin2016.asc](#)
  - [uncertainty\\_combined\\_gries2016.asc](#)

The copyright of individual parts of the supplement might differ from the CC BY 3.0 License.
